# Supplementary material for: Usefulness of BioFire FilmArray BCID2 for Blood Culture Processing in Clinical Practice
Source: PubMed Central journal article supplement (PMC8373244; doi:10.1128/jcm.00543-21), 2021-07-19
Supplement: jcm.00543-21-s0001.pdf [file jcm.00543-21-s0001.pdf]

## Supplementary material

**Table S1: Comparison of species ID and if applicable resistance patterns/genes following SOC work-flows and BCID2**

| Study number | ID Maldi (+ if applicable resistance type/gene)                                                                    | ID BCID2 (resistance determinant; if applicable)                                                       |
|--------------|--------------------------------------------------------------------------------------------------------------------|--------------------------------------------------------------------------------------------------------|
| 1            | <i>Streptococcus anginosus</i> Group                                                                               | <i>Streptococcus</i> spp.                                                                              |
| 2            | <i>Streptococcus agalactiae</i>                                                                                    | <i>Streptococcus agalactiae</i>                                                                        |
| 3            | <i>Escherichia coli</i>                                                                                            | <i>Escherichia coli</i>                                                                                |
| 4            | <i>Klebsiella pneumoniae</i>                                                                                       | <i>Klebsiella pneumoniae</i> Group                                                                     |
| 5            | <i>Klebsiella pneumoniae</i> , <i>Staphylococcus capitis</i>                                                       | <i>Klebsiella pneumoniae</i> group                                                                     |
| 6            | <i>Enterococcus faecalis</i>                                                                                       | <i>Enterococcus faecalis</i> , <i>Staphylococcus</i> spp.                                              |
| 7            | <i>Providencia rettgeri</i> , <i>Staphylococcus epidermidis</i> ( <i>mecA/C</i> ), <i>Streptococcus agalactiae</i> | Enteric bacteria, <i>Staphylococcus epidermidis</i> ( <i>mecA/C</i> ), <i>Streptococcus agalactiae</i> |
| 8            | <i>Escherichia coli</i>                                                                                            | <i>Escherichia coli</i>                                                                                |
| 9            | <i>Escherichia coli</i>                                                                                            | <i>Escherichia coli</i>                                                                                |
| 10           | <i>Escherichia coli</i>                                                                                            | <i>Escherichia coli</i>                                                                                |
| 11           | <i>Enterococcus faecium</i>                                                                                        | <i>Enterococcus faecium</i>                                                                            |
| 12           | <i>Enterococcus faecalis</i> , <i>Staphylococcus aureus</i>                                                        | <i>Enterococcus faecalis</i> , <i>Staphylococcus aureus</i>                                            |
| 13           | <i>Escherichia coli</i>                                                                                            | <i>Escherichia coli</i>                                                                                |
| 14           | <i>Pseudomonas aeruginosa</i> ( <i>bla<sub>VIM-2</sub></i> ), <i>Stenotrophomas maltophilia</i>                    | <i>Pseudomonas aeruginosa</i> ( <i>bla<sub>VIM</sub></i> )                                             |
| 15           | <i>Escherichia coli</i> (3GCR)                                                                                     | <i>Escherichia coli</i> ( <i>bla<sub>CTX-M</sub></i> )                                                 |

|    |                                                                               |                                                                                            |
|----|-------------------------------------------------------------------------------|--------------------------------------------------------------------------------------------|
|    |                                                                               |                                                                                            |
| 16 | <i>Streptococcus pyogenes</i>                                                 | <i>Streptococcus pyogenes</i>                                                              |
| 17 | <i>Klebsiella pneumoniae</i>                                                  | none                                                                                       |
| 18 | <i>Streptococcus salivarius</i> Group                                         | <i>Streptococcus</i> spp.                                                                  |
| 19 | <i>Serratia marcescens</i>                                                    | <i>Serratia marcescens</i>                                                                 |
| 20 | <i>Enterococcus faecium</i> , <i>Staphylococcus haemolyticus</i> (mecA/C)     | <i>Enterococcus faecium</i> , <i>Staphylococcus epidermidis</i> (mecA/C)                   |
| 21 | <i>Pseudomonas aeruginosa</i>                                                 | <i>Pseudomonas aeruginosa</i>                                                              |
| 22 | <i>Streptococcus pneumoniae</i>                                               | <i>Streptococcus pneumoniae</i>                                                            |
| 23 | <i>Escherichia coli</i>                                                       | <i>Escherichia coli</i>                                                                    |
| 24 | <i>Escherichia coli</i>                                                       | <i>Escherichia coli</i>                                                                    |
| 25 | <i>Enterococcus faecalis</i>                                                  | <i>Enterococcus faecalis</i>                                                               |
| 26 | <i>Enterococcus faecium</i>                                                   | <i>Enterococcus faecium</i>                                                                |
| 27 | <i>Haemophilus influenzae</i> ,<br><i>Staphylococcus epidermidis</i> (mecA/C) | <i>Haemophilus influenzae</i> , <i>Staphylococcus epidermidis</i> (mecA/C)                 |
| 28 | <i>Escherichia coli</i>                                                       | <i>Escherichia coli</i> , <i>Staphylococcus epidermidis</i> (mecA/C)                       |
| 29 | <i>Streptococcus salivarius</i> Group                                         | <i>Streptococcus</i> spp.                                                                  |
| 30 | <i>Escherichia coli</i> (3GCR)                                                | <i>Escherichia coli</i> (bla <sub>CTX-M</sub> )                                            |
| 31 | <i>Klebsiella pneumoniae</i> (bla <sub>oxa-48</sub> )                         | <i>Klebsiella pneumoniae</i> group (bla <sub>CTX-M</sub> ,<br>(bla <sub>oxa-48</sub> -like |
| 32 | <i>Candida krusei</i>                                                         | <i>Candida krusei</i>                                                                      |

|    |                                                                    |                                                       |
|----|--------------------------------------------------------------------|-------------------------------------------------------|
|    |                                                                    |                                                       |
| 33 | <i>Enterobacter cloacae</i> Complex                                | <i>Enterobacter cloacae</i> Complex                   |
| 34 | <i>Staphylococcus hominis</i>                                      | <i>Staphylococcus</i> spp.                            |
| 35 | <i>Escherichia coli</i>                                            | <i>Escherichia coli</i>                               |
| 36 | <i>Streptococcus mitis</i> Group,<br><i>Staphylococcus hominis</i> | <i>Staphylococcus</i> spp. <i>Streptococcus</i> spp.  |
| 37 | <i>Streptococcus pneumoniae</i>                                    | <i>Streptococcus pneumoniae</i>                       |
| 38 | <i>Staphylococcus aureus</i>                                       | <i>Staphylococcus aureus</i>                          |
| 39 | <i>Escherichia coli</i> (3GCR)                                     | <i>Escherichia coli</i>                               |
| 40 | <i>Enterobacter cloacae</i> Complex                                | <i>Enterobacter cloacae</i> Complex                   |
| 41 | <i>Klebsiella pneumoniae</i>                                       | <i>Klebsiella pneumoniae</i> Group                    |
| 42 | <i>Enterococcus faecium</i>                                        | <i>Enterococcus faecium</i>                           |
| 43 | <i>Escherichia coli</i>                                            | <i>Escherichia coli</i>                               |
| 44 | <i>Escherichia coli</i>                                            | <i>Escherichia coli</i>                               |
| 45 | <i>Enterococcus faecium</i> (vanB)                                 | <i>Enterococcus faecium</i> (vanA/B)                  |
| 46 | <i>Staphylococcus aureus</i>                                       | <i>Staphylococcus aureus</i>                          |
| 47 | <i>Staphylococcus haemolyticus</i> (mecA/C)                        | <i>Staphylococcus epidermidis</i> (mecA/C)            |
| 48 | <i>Pseudomonas aeruginosa</i>                                      | <i>Pseudomonas aeruginosa</i>                         |
| 49 | <i>Escherichia coli</i> , <i>Enterococcus faecium</i>              | <i>Escherichia coli</i> , <i>Enterococcus faecium</i> |

|    |                                                                 |                                                                             |
|----|-----------------------------------------------------------------|-----------------------------------------------------------------------------|
|    |                                                                 |                                                                             |
| 50 | <i>Streptococcus dysgalactiae</i>                               | <i>Streptococcus spp.</i>                                                   |
| 51 | <i>Enterococcus faecium, Staphylococcus epidermidis</i>         | <i>Enterococcus faecium</i>                                                 |
| 52 | <i>Streptococcus dysgalactiae</i>                               | <i>Streptococcus spp.</i>                                                   |
| 53 | <i>Enterococcus faecium (vanB), Staphylococcus haemolyticus</i> | <i>Enterococcus faecium (vanA/B), Staphylococcus spp.</i>                   |
| 54 | <i>Enterococcus faecalis</i>                                    | <i>Enterococcus faecalis, Staphylococcus epidermidis (mecA/C)</i>           |
| 55 | <i>Enterococcus faecium (vanB)</i>                              | <i>Enterococcus faecium (vanA/B)</i>                                        |
| 56 | <i>Escherichia coli (3GCR)</i>                                  | <i>Escherichia coli (bla<sub>CTX-M</sub>)</i>                               |
| 57 | <i>Escherichia coli</i>                                         | <i>Escherichia coli</i>                                                     |
| 58 | <i>Escherichia coli, Aeromonas veronii</i>                      | <i>Escherichia coli, Klebsiella pneumoniae Group, (bla<sub>CTX-M</sub>)</i> |
| 59 | <i>Enterobacter cloacae</i> Complex                             | <i>Enterobacter cloacae</i> Complex                                         |
| 60 | <i>Proteus mirabilis</i>                                        | <i>Proteus spp.</i>                                                         |
| 61 | <i>Staphylococcus aureus</i>                                    | <i>Staphylococcus aureus</i>                                                |
| 62 | <i>Staphylococcus haemolyticus (mecA/C)</i>                     | <i>Staphylococcus epidermidis (mecA/C)</i>                                  |
| 63 | <i>Streptococcus sanguinis</i> Group                            | <i>Streptococcus spp.</i>                                                   |
| 64 | <i>Escherichia coli, Staphylococcus epidermidis (mecA/C)</i>    | <i>Escherichia coli, Staphylococcus epidermidis (mecA/C)</i>                |
| 65 | <i>Streptococcus agalactiae</i>                                 | <i>Streptococcus agalactiae</i>                                             |
| 66 | <i>Escherichia coli</i>                                         | <i>Escherichia coli</i>                                                     |

|    |                                                                                                                            |                                                                                                                             |
|----|----------------------------------------------------------------------------------------------------------------------------|-----------------------------------------------------------------------------------------------------------------------------|
| 67 | <i>Escherichia coli</i>                                                                                                    | <i>Escherichia coli</i>                                                                                                     |
| 68 | <i>Staphylococcus aureus</i>                                                                                               | <i>Staphylococcus aureus</i>                                                                                                |
| 69 | <i>Streptococcus pneumoniae</i>                                                                                            | <i>Streptococcus pneumoniae</i>                                                                                             |
| 70 | <i>Escherichia coli</i> (3GCR)                                                                                             | <i>Escherichia coli</i> ( <i>bla</i> <sub>CTX-M</sub> ), <i>Staphylococcus epidermidis</i> ( <i>mecA/C</i> )                |
| 71 | <i>Staphylococcus aureus</i>                                                                                               | <i>Staphylococcus aureus</i>                                                                                                |
| 72 | <i>Escherichia coli</i>                                                                                                    | <i>Escherichia coli</i>                                                                                                     |
| 73 | <i>Escherichia coli</i> , <i>Staphylococcus epidermidis</i>                                                                | <i>Escherichia coli</i> , <i>Staphylococcus spp.</i>                                                                        |
| 74 | <i>Enterococcus faecium</i> ( <i>vanB</i> )                                                                                | <i>Enterococcus faecium</i> ( <i>vanA/B</i> )                                                                               |
| 75 | <i>Staphylococcus haemolyticus</i> ( <i>mecA/C</i> ), <i>Candida krusei</i>                                                | <i>Staphylococcus epidermidis</i> ( <i>mecA/C</i> ), <i>Candida krusei</i>                                                  |
| 76 | <i>Enterococcus faecalis</i> , <i>Staphylococcus epidermidis</i>                                                           | <i>Enterococcus faecalis</i> , <i>Staphylococcus epidermidis</i>                                                            |
| 77 | <i>Staphylococcus haemolyticus</i>                                                                                         | <i>Staphylococcus spp.</i>                                                                                                  |
| 78 | <i>Escherichia coli</i>                                                                                                    | <i>Escherichia coli</i>                                                                                                     |
| 79 | <i>Enterococcus faecium</i> ( <i>vanB</i> ), <i>Candida albicans</i> , <i>Staphylococcus epidermidis</i> ( <i>mecA/C</i> ) | <i>Enterococcus faecium</i> ( <i>vanA/B</i> ), <i>Staphylococcus epidermidis</i> ( <i>mecA/C</i> ), <i>Candida albicans</i> |
| 80 | <i>Streptococcus dysgalactiae</i>                                                                                          | <i>Streptococcus spp.</i>                                                                                                   |
| 81 | <i>Enterococcus faecium</i> ( <i>vanB</i> )                                                                                | <i>Enterococcus faecium</i> ( <i>vanA/B</i> )                                                                               |
| 82 | <i>Escherichia coli</i> (3GCR), <i>Streptococcus anginosus</i> Group                                                       | <i>Escherichia coli</i> ( <i>bla</i> <sub>CTX-M</sub> ), <i>Bacteroides fragilis</i> , <i>Streptococcus spp.</i>            |
| 83 | <i>Escherichia coli</i>                                                                                                    | <i>Escherichia coli</i>                                                                                                     |

|     |                                                                                      |                                                                                        |
|-----|--------------------------------------------------------------------------------------|----------------------------------------------------------------------------------------|
|     |                                                                                      |                                                                                        |
| 84  | <i>Staphylococcus aureus</i>                                                         | <i>Staphylococcus aureus</i>                                                           |
| 85  | <i>Streptococcus pneumoniae</i>                                                      | <i>Streptococcus pneumoniae</i>                                                        |
| 86  | <i>Staphylococcus aureus</i>                                                         | <i>Staphylococcus aureus</i>                                                           |
| 87  | <i>Streptococcus agalactiae</i> ,<br><i>Staphylococcus epidermidis</i>               | <i>Streptococcus agalactiae</i> , <i>Staphylococcus epidermidis</i>                    |
| 88  | <i>Streptococcus equinus/bovis</i> Group                                             | <i>Streptococcus spp.</i>                                                              |
| 89  | <i>Escherichia coli</i> (3GCR)                                                       | <i>Escherichia coli</i> ( <i>bla</i> <sub>CTX-M</sub> )                                |
| 90  | <i>Escherichia coli</i> (3GCR), <i>Pseudomonas aeruginosa</i>                        | <i>Escherichia coli</i> ( <i>bla</i> <sub>CTX-M</sub> ), <i>Pseudomonas aeruginosa</i> |
| 91  | <i>Escherichia coli</i>                                                              | <i>Escherichia coli</i>                                                                |
| 92  | <i>Escherichia coli</i>                                                              | <i>Escherichia coli</i>                                                                |
| 93  | <i>Staphylococcus aureus</i>                                                         | <i>Staphylococcus aureus</i>                                                           |
| 94  | <i>Staphylococcus aureus</i>                                                         | <i>Staphylococcus aureus</i>                                                           |
| 95  | <i>Escherichia coli</i>                                                              | <i>Escherichia coli</i>                                                                |
| 96  | <i>Staphylococcus epidermidis</i> ( <i>mecA/C</i> ),<br><i>Staphylococcus caprae</i> | <i>Staphylococcus epidermidis</i> ( <i>mecA/C</i> )                                    |
| 97  | <i>Staphylococcus haemolyticus</i>                                                   | <i>Staphylococcus epidermidis</i>                                                      |
| 98  | <i>Staphylococcus epidermidis</i> , <i>Bacillus cereus</i> Group                     | <i>Staphylococcus epidermidis</i>                                                      |
| 99  | <i>Staphylococcus haemolyticus</i>                                                   | <i>Staphylococcus spp.</i>                                                             |
| 100 | <i>Klebsiella oxytoca</i>                                                            | <i>Klebsiella oxytoca</i>                                                              |

|     |                                                           |                                                      |
|-----|-----------------------------------------------------------|------------------------------------------------------|
| 101 | <i>Staphylococcus hominis, Staphylococcus epidermidis</i> | <i>Staphylococcus epidermidis</i>                    |
| 102 | <i>Enterococcus faecalis</i>                              | <i>Enterococcus faecalis</i>                         |
| 103 | <i>Staphylococcus aureus</i>                              | <i>Staphylococcus aureus</i>                         |
| 104 | <i>Staphylococcus hominis</i>                             | <i>Staphylococcus spp.</i>                           |
| 105 | <i>Klebsiella oxytoca</i>                                 | <i>Klebsiella oxytoca</i>                            |
| 106 | <i>Enterococcus faecium</i>                               | <i>Enterococcus faecium</i>                          |
| 107 | <i>Klebsiella pneumoniae</i>                              | <i>Klebsiella pneumoniae Group</i>                   |
| 108 | <i>Enterococcus faecalis</i>                              | <i>Enterococcus faecalis</i>                         |
| 109 | <i>Enterococcus hirae</i>                                 | none                                                 |
| 110 | <i>Acinetobacter baumannii complex</i>                    | <i>Acinetobacter calcoaceticus-baumannii Complex</i> |
| 111 | <i>Escherichia coli</i>                                   | <i>Escherichia coli</i>                              |
| 112 | <i>Enterococcus faecium (vanB)</i>                        | <i>Enterococcus faecium (vanA/B)</i>                 |
| 113 | <i>Escherichia coli (3GCR)</i>                            | <i>Escherichia coli (bla<sub>CTX-M</sub>)</i>        |
| 114 | <i>Proteus mirabilis</i>                                  | <i>Proteus spp.</i>                                  |
| 115 | <i>Enterococcus faecium</i>                               | <i>Enterococcus faecium</i>                          |
| 116 | <i>Klebsiella pneumoniae (3GCR)</i>                       | <i>Klebsiella pneumoniae Group</i>                   |
| 117 | <i>Escherichia coli</i>                                   | <i>Escherichia coli</i>                              |

|     |                                                                      |                                                    |
|-----|----------------------------------------------------------------------|----------------------------------------------------|
|     |                                                                      |                                                    |
| 118 | <i>Staphylococcus haemolyticus</i>                                   | <i>Staphylococcus epidermidis (mecA/C)</i>         |
| 119 | <i>Staphylococcus haemolyticus</i>                                   | <i>Staphylococcus spp.</i>                         |
| 120 | <i>Proteus mirabilis</i>                                             | <i>Proteus spp.</i>                                |
| 121 | <i>Staphylococcus haemolyticus</i>                                   | <i>Staphylococcus spp.</i>                         |
| 122 | <i>Staphylococcus hominis</i>                                        | <i>Staphylococcus spp.</i>                         |
| 123 | <i>Clostridium perfringens, Staphylococcus epidermidis</i>           | none                                               |
| 124 | <i>Enterococcus faecium (vanA)</i>                                   | <i>Enterococcus faecium (vanA/B)</i>               |
| 125 | <i>Staphylococcus aureus</i>                                         | <i>Staphylococcus aureus</i>                       |
| 126 | <i>Escherichia coli</i>                                              | <i>Escherichia coli</i>                            |
| 127 | <i>Enterococcus faecalis, Enterococcus faecium, Candida albicans</i> | <i>Enterococcus faecalis, Enterococcus faecium</i> |
| 128 | <i>Streptococcus equinus/bovis</i> Group                             | <i>Streptococcus spp.</i>                          |
| 129 | <i>Klebsiella oxytoca, Enterococcus faecium (vanB)</i>               | <i>Klebsiella oxytoca</i>                          |
| 130 | <i>Streptococcus pyogenes</i>                                        | <i>Streptococcus pyogenes</i>                      |
| 131 | <i>Escherichia coli</i>                                              | <i>Escherichia coli</i>                            |
| 132 | <i>Escherichia coli</i>                                              | <i>Escherichia coli</i>                            |
| 133 | <i>Pseudomonas aeruginosa</i>                                        | <i>Pseudomonas aeruginosa</i>                      |
| 134 | <i>Pseudomonas aeruginosa</i>                                        | <i>Pseudomonas aeruginosa</i>                      |



|     |                                                       |                                                       |
|-----|-------------------------------------------------------|-------------------------------------------------------|
|     |                                                       |                                                       |
| 135 | <i>Klebsiella oxytoca</i> (3GCR)                      | <i>Klebsiella oxytoca</i>                             |
| 136 | <i>Klebsiella pneumoniae</i>                          | <i>Klebsiella pneumoniae</i> group                    |
| 137 | <i>Streptococcus pneumoniae</i>                       | <i>Streptococcus pneumoniae</i>                       |
| 138 | <i>Klebsiella pneumoniae</i>                          | <i>Klebsiella pneumoniae</i> group                    |
| 139 | <i>Staphylococcus aureus</i>                          | <i>Staphylococcus aureus</i>                          |
| 140 | <i>Staphylococcus epidermidis</i>                     | <i>Staphylococcus epidermidis</i>                     |
| 141 | <i>Escherichia coli</i>                               | <i>Escherichia coli</i>                               |
| 142 | <i>Enterococcus faecium</i> (vanB)                    | invalid                                               |
| 143 | <i>Streptococcus dysgalactiae</i>                     | <i>Streptococcus</i> spp.                             |
| 144 | <i>Klebsiella pneumoniae</i> (3GCR)                   | <i>Klebsiella pneumoniae</i> group                    |
| 145 | <i>Escherichia coli</i> , <i>Enterococcus faecium</i> | <i>Escherichia coli</i> , <i>Enterococcus faecium</i> |
| 146 | <i>Escherichia coli</i>                               | <i>Escherichia coli</i>                               |
| 147 | <i>Escherichia coli</i>                               | <i>Escherichia coli</i>                               |
| 148 | <i>Streptococcus dysgalactiae</i>                     | <i>Streptococcus</i> spp.                             |
| 149 | <i>Streptococcus mitis</i> Group                      | <i>Streptococcus</i> spp.                             |
| 150 | <i>Escherichia coli</i>                               | <i>Escherichia coli</i>                               |
| 151 | <i>Enterobacter cloacae</i> Complex                   | <i>Enterobacter cloacae</i> Complex                   |

|     |                                                        |                                                         |
|-----|--------------------------------------------------------|---------------------------------------------------------|
|     |                                                        |                                                         |
| 152 | <i>Staphylococcus haemolyticus</i>                     | <i>Staphylococcus spp.</i>                              |
| 153 | <i>Escherichia coli</i> (3GCR)                         | <i>Escherichia coli</i> ( <i>bla</i> <sub>CTX-M</sub> ) |
| 154 | <i>Enterobacter cloacae</i> Complex                    | <i>Enterobacter cloacae</i> Complex                     |
| 155 | <i>Klebsiella aerogenes</i>                            | <i>Klebsiella aerogenes</i>                             |
| 156 | <i>Morganella morganii</i>                             | Enteric bacteria                                        |
| 157 | <i>Escherichia coli</i> , <i>Staphylococcus aureus</i> | <i>Escherichia coli</i> , <i>Staphylococcus aureus</i>  |
| 158 | <i>Klebsiella pneumoniae</i> (3GCR)                    | <i>Klebsiella pneumoniae</i> group                      |
| 159 | <i>Staphylococcus haemolyticus</i>                     | <i>Staphylococcus spp.</i>                              |
| 160 | <i>Streptococcus dysgalactiae</i>                      | <i>Streptococcus spp.</i>                               |
| 161 | <i>Staphylococcus hominis</i>                          | <i>Staphylococcus spp.</i>                              |
| 162 | <i>Staphylococcus aureus</i>                           | <i>Staphylococcus aureus</i>                            |
| 163 | <i>Proteus mirabilis</i>                               | <i>Proteus spp.</i>                                     |
| 164 | <i>Proteus mirabilis</i>                               | <i>Proteus spp.</i>                                     |
| 165 | <i>Staphylococcus epidermidis</i> ( <i>mecA/C</i> )    | <i>Staphylococcus epidermidis</i> ( <i>mecA/C</i> )     |
| 166 | <i>Escherichia coli</i> (3GCR)                         | <i>Escherichia coli</i> ( <i>bla</i> <sub>CTX-M</sub> ) |
| 167 | <i>Staphylococcus caprae</i>                           | <i>Staphylococcus spp.</i>                              |
| 168 | <i>Staphylococcus haemolyticus</i>                     | <i>Staphylococcus spp.</i>                              |

|     |                                                                                       |                                                                       |
|-----|---------------------------------------------------------------------------------------|-----------------------------------------------------------------------|
|     |                                                                                       |                                                                       |
| 169 | <i>Pseudomonas aeruginosa</i>                                                         | <i>Pseudomonas aeruginosa</i>                                         |
| 170 | <i>Staphylococcus hominis</i>                                                         | <i>Staphylococcus spp.</i>                                            |
| 171 | <i>Klebsiella oxytoca</i>                                                             | <i>Klebsiella oxytoca</i>                                             |
| 172 | <i>Acinetobacter beijerinckii</i>                                                     | none                                                                  |
| 173 | <i>Streptococcus pneumoniae</i>                                                       | <i>Streptococcus pneumoniae</i>                                       |
| 174 | <i>Escherichia coli</i>                                                               | <i>Escherichia coli</i>                                               |
| 175 | <i>Proteus mirabilis, Staphylococcus aureus</i>                                       | <i>Proteus spp., Staphylococcus aureus</i>                            |
| 176 | <i>Escherichia coli</i> (3GCR)                                                        | <i>Escherichia coli</i> ( <i>bla</i> <sub>CTX-M</sub> )               |
| 177 | <i>Staphylococcus hominis</i>                                                         | <i>Staphylococcus spp.</i>                                            |
| 178 | <i>Pantoea agglomerans, Staphylococcus haemolyticus</i>                               | Enteric bacteria, <i>Staphylococcus epidermidis</i> ( <i>mecA/C</i> ) |
| 179 | <i>Staphylococcus epidermidis</i> ( <i>mecA/C</i> ),<br><i>Staphylococcus hominis</i> | <i>Staphylococcus epidermidis</i> ( <i>mecA/C</i> )                   |
| 180 | <i>Streptococcus dysgalactiae</i>                                                     | <i>Streptococcus spp.</i>                                             |
| 181 | <i>Klebsiella pneumoniae, Pseudomonas aeruginosa</i>                                  | <i>Klebsiella pneumoniae</i> group,<br><i>Pseudomonas aeruginosa</i>  |
| 182 | <i>Enterococcus faecium</i>                                                           | <i>Enterococcus faecium</i>                                           |
| 183 | <i>Klebsiella pneumoniae</i>                                                          | <i>Klebsiella pneumoniae</i> Group                                    |
